# Supplementary material
Source: publisher figshare collection journal article supplement (https://acs.figshare.com/ndownloader/files/8274482)
Supplement: Supplementary file 1 [file 8274482]

# Supporting Information

## **CPPred-RF: a sequence-based predictor for identifying cell-penetrating peptides and their uptake efficiency**

Leyi Wei<sup>1</sup>, PengWei Xing<sup>1</sup>, Ran Su<sup>2</sup>, Gaotao Shi<sup>1</sup>, Zhanshan (Sam) Ma<sup>3\*</sup> and Quan Zou<sup>1,3\*</sup>

1. School of Computer Science and Technology, Tianjin University, Tianjin, China
2. School of Software, Tianjin University, Tianjin, China
3. State Key Laboratory of Genetic Resources and Evolution, Kunming Institute of Zoology, Chinese Academy of Sciences, Kunming, China

\*Corresponding author: [samma@uidaho.edu](mailto:samma@uidaho.edu) and [zouquan@tju.edu.cn](mailto:zouquan@tju.edu.cn)

### **Table of Contents**

**Supplementary method S-1.** Algorithmic details of feature descriptors-----S2

**Supplementary method S-2.** Algorithmic details of performance metrics-----S5

**Table S-1.** Predictive results of 1st layer and 2nd layer models varying the number of features.-----S6

## Supplementary method S-1. Algorithmic details of feature descriptors

For convenience of discussion, a given peptide sequence is denoted as  $\mathbf{P}=P_1P_2...P_L$ , where  $P_i$  represents the  $i$ -th amino acid in  $\mathbf{P}$  and  $L$  represents the length of  $\mathbf{P}$ . In the following subsections, we describe how to use the above four feature descriptors to represent the sequence  $\mathbf{P}$ , respectively.

### 1) Features based on PC-PseAAC

For given a peptide sequence  $\mathbf{P}$ , the PC-PseAAC feature vector is represented by,

$$FV = [fv_1, fv_2, \dots, fv_{20}, fv_{20+1}, \dots, fv_{20+\lambda}]^T \quad (1)$$

where

$$fv_u = \begin{cases} \frac{f_u}{\sum_{i=1}^{20} f_i + w \sum_{j=1}^{\lambda} \theta_j}, & 1 \leq u \leq 20 \\ \frac{w\theta_{u-20}}{\sum_{i=1}^{20} f_i + w \sum_{j=1}^{\lambda} \theta_j}, & 20 + 1 \leq u \leq 20 + \lambda \end{cases} \quad (2)$$

where  $u$  is an integer;  $fv_u$  ( $1 \leq u \leq 20$ ) represents the normalized appearance frequency of the 20 amino acids in  $\mathbf{P}$ ;  $\lambda$  represents the highest tier of the correlation along  $\mathbf{P}$ ;  $\theta_j$  ( $j = 1, 2, \dots, \lambda$ ) is the correlation function that measures the  $j$ -tier sequence-order correlation between all the  $j$ -th most contiguous residues along  $\mathbf{P}$ .  $\theta_j$  is subject to the following formula,

$$\theta_j = \frac{1}{L} \sum_{i=1}^{L-j} \frac{1}{3} \sum_{m=1}^3 [H_m(P_{i+j}) - H_m(P_i)]^2 \quad (3)$$

where  $H_m(P_i)$  ( $m=1,2,3$ ) represents the normalized hydrophobicity value, the hydrophilicity value, and the side-chain mass value corresponding to the  $i$ -th amino acid  $P_i$  in the peptide sequence  $\mathbf{P}$ , respectively. They are calculated by the following formula,

$$H_m(P_i) = \frac{H'_m(P_i) - \sum_{j=1}^{20} \frac{H'_m(A_j)}{20}}{\sqrt{\frac{\sum_{l=1}^{20} [H'_m(A_l) - \sum_{j=1}^{20} \frac{H'_m(A_j)}{20}]^2}{20}}} \quad (4)$$

where  $H'_m(P_i)$  is the original value of  $H_m(P_i)$ .

## 2) Features based on SC-PseAAC

For given a peptide sequence  $\mathbf{P}$ , the SC-PseAAC feature vector is represented by,

$$FV = [fv_1, fv_2, \dots, fv_{20}, fv_{20+1}, \dots, fv_{20+2\lambda}]^T \quad (5)$$

where

$$fv_u = \begin{cases} \frac{f_u}{\sum_{i=1}^{20} f_i + w \sum_{j=1}^{2\lambda} \tau_j}, & 1 \leq u \leq 20 \\ \frac{w\tau_{u-20}}{\sum_{i=1}^{20} f_i + w \sum_{j=1}^{2\lambda} \tau_j}, & 20 + 1 \leq u \leq 20 + 2\lambda \end{cases} \quad (6)$$

where  $fv_u$  ( $1 \leq u \leq 20$ ) represents the normalized appearance frequency of the 20 amino acids in  $\mathbf{P}$ ;  $\lambda$  is the highest tier of the correlation along  $\mathbf{P}$ ;  $\tau_j$  ( $j = 1, 2, \dots, \lambda$ ) is the correlation function, which measures the  $j$ -tier sequence-correlation between all the  $j$ -th most contiguous residues along  $\mathbf{P}$  and is defined by,

$$\begin{cases} \tau_{2k-1} = \frac{1}{L-k} \sum_{j=1}^{L-k} H_1(P_i)H_1(P_{i+k}) \\ \tau_{2k} = \frac{1}{L-k} \sum_{j=1}^{L-k} H_2(P_i)H_2(P_{i+k}) \end{cases} \quad (7)$$

where  $H_1(P_i)$  and  $H_2(P_i)$  are the standardized values of hydrophobicity and hydrophilicity, respectively.

## 3) Features based on adaptive skip dipeptide composition

For given a peptide sequence  $\mathbf{P}$ , dipeptide composition is defined as the fraction of any two adjacent residues ( $P_i P_{i+1}$ )<sup>11</sup>. It measures the correlation of any two adjacent residues in a sequence. However, it is obvious that the correlation information of those intervening (non-adjacent) two residues ( $P_i P_j; j - i > 1$ ) would be lost. To address this problem, we present a modified dipeptide composition, called adaptive skip dipeptide composition, which computes frequencies of any two residues in the sequence  $\mathbf{P}$ . The proposed adaptive skip dipeptide composition sufficiently considers the correlation not only between adjacent residues but also between intervening residues. For given a peptide sequence  $\mathbf{P}$ , the feature vector for adaptive skip dipeptide composition is represented by,

$$FV = [fv_1, fv_2, \dots, fv_{400}]^T \quad (8)$$

where

$$fv_i = \frac{O^i}{\sum_{k=1}^L n(k)} \quad (9)$$

where  $O^i$  represents the observed number of  $i$ -th two-residue pair and  $n(k)$  represents the number of all possible two residues with  $\leq k$  intervening residues. If  $k=1$ , the feature vector is exactly the dipeptide composition.

#### **4) Features based on physicochemical properties**

Physicochemical properties have proven to provide insights into the differences between the classes of CPPs and non-CPPs<sup>10,13</sup>. To capture the physicochemical information, we adopted a powerful feature descriptor that uses protein physicochemical properties to represent peptide sequences<sup>18,19</sup>. This feature descriptor considers the following eight physicochemical properties: (1) normalized van der waals volume, (2) secondary structure, (3) solvent accessibility, (4) polarizability, (5) polarity, (6) hydrophobicity, (7) charge, and (8) surface tension. For each property, 20 standard amino acids {A,N,C,Q,G,H,I,L,M,F,P,S,T,W,Y,V,D,E,K,R} are divided into three groups, e.g., {ANCQGHILMFPSTWYV, DE, KR} for the charge property. To quantize the physicochemical information, the sequence **P** is encoded from the following three aspects: content, distribution and bivalent frequency for each physicochemical property. The details of encoding procedure can be referred to<sup>18,19</sup>. To this end, the peptide sequence **P** is subsequently represented with a 188-dimension feature vector.

## Supplementary method S-2. Algorithmic details of performance metrics

Five commonly used metrics for a binary classification task are employed in present study, which include Sensitivity (SE), Specificity (SP), Accuracy (ACC), Mathew's correlation coefficient (MCC), and area under the receiver operating characteristic curve (AUC). Of these metrics, AUC is to calculate the area under the receiver operating characteristic curve; while the other metrics are respectively calculated as,

$$SE = \frac{TP}{TP + FN} * 100\%$$

$$SP = \frac{TN}{TN + FP} * 100\%$$

$$ACC = \frac{TP + TN}{TP + FN + TN + FP} * 100$$

$$MCC = \frac{TP * TN - FP * FN}{\sqrt{(TP + FN)(TP + FP)(TN + FP)(TN + FN)}}$$

where TP, TN, FP, and FN are the number of true positive, true negative, false positive, and false negative, respectively.

**Table S-1. Predictive results of 1<sup>st</sup> layer and 2<sup>nd</sup> layer models varying the number of features.**

| 1 <sup>st</sup> layer model |              |              | 2 <sup>nd</sup> layer model |              |              |
|-----------------------------|--------------|--------------|-----------------------------|--------------|--------------|
| <i>No. of Features</i>      | <i>ACC</i>   | <i>MCC</i>   | <i>No. of Features</i>      | <i>ACC</i>   | <i>MCC</i>   |
| 10                          | 0.742        | 0.485        | 10                          | 0.607        | 0.214        |
| 20                          | 0.789        | 0.578        | 20                          | 0.61         | 0.219        |
| 30                          | 0.819        | 0.64         | 30                          | 0.634        | 0.268        |
| 40                          | 0.842        | 0.684        | 40                          | 0.631        | 0.263        |
| 50                          | 0.845        | 0.691        | 50                          | 0.658        | 0.317        |
| 60                          | 0.854        | 0.708        | 60                          | 0.663        | 0.328        |
| 70                          | 0.859        | 0.72         | 70                          | 0.65         | 0.3          |
| 80                          | 0.855        | 0.71         | 80                          | 0.663        | 0.327        |
| 90                          | 0.861        | 0.723        | 90                          | 0.644        | 0.291        |
| 100                         | 0.866        | 0.732        | 100                         | 0.65         | 0.3          |
| 110                         | 0.883        | 0.766        | 110                         | 0.671        | 0.342        |
| 120                         | 0.876        | 0.752        | 120                         | 0.682        | 0.364        |
| 130                         | 0.881        | 0.762        | 130                         | 0.668        | 0.338        |
| 140                         | 0.879        | 0.758        | 140                         | 0.676        | 0.354        |
| 150                         | 0.883        | 0.767        | 150                         | 0.674        | 0.348        |
| 160                         | 0.886        | 0.774        | 160                         | 0.66         | 0.321        |
| 170                         | 0.886        | 0.773        | 170                         | 0.684        | 0.369        |
| 180                         | 0.896        | 0.793        | 180                         | 0.69         | 0.38         |
| 190                         | 0.9          | 0.801        | 190                         | 0.693        | 0.385        |
| 200                         | 0.9          | 0.801        | 200                         | 0.687        | 0.375        |
| 210                         | 0.905        | 0.81         | 210                         | 0.674        | 0.348        |
| 220                         | 0.903        | 0.806        | 220                         | 0.687        | 0.374        |
| 230                         | 0.904        | 0.808        | 230                         | 0.679        | 0.359        |
| 240                         | 0.896        | 0.793        | 240                         | 0.69         | 0.38         |
| 250                         | 0.906        | 0.812        | 250                         | 0.701        | 0.402        |
| 260                         | 0.9          | 0.802        | 260                         | 0.684        | 0.369        |
| 270                         | 0.907        | 0.815        | 270                         | 0.703        | 0.407        |
| 280                         | 0.9          | 0.802        | 280                         | 0.693        | 0.385        |
| <b>290</b>                  | <b>0.916</b> | <b>0.831</b> | 290                         | 0.695        | 0.391        |
| 300                         | 0.895        | 0.79         | 300                         | 0.701        | 0.401        |
| 310                         | 0.903        | 0.805        | 310                         | 0.69         | 0.38         |
| 320                         | 0.909        | 0.819        | 320                         | 0.684        | 0.369        |
| 330                         | 0.906        | 0.812        | 330                         | 0.703        | 0.407        |
| 340                         | 0.907        | 0.815        | <b>340</b>                  | <b>0.711</b> | <b>0.423</b> |
| 350                         | 0.906        | 0.813        | 350                         | 0.666        | 0.332        |
| 360                         | 0.907        | 0.814        | 360                         | 0.687        | 0.375        |

|     |       |       |     |       |       |
|-----|-------|-------|-----|-------|-------|
| 370 | 0.909 | 0.818 | 370 | 0.711 | 0.423 |
| 380 | 0.906 | 0.812 | 380 | 0.687 | 0.374 |
| 390 | 0.911 | 0.823 | 390 | 0.69  | 0.38  |
| 400 | 0.9   | 0.802 | 400 | 0.687 | 0.374 |
| 410 | 0.903 | 0.806 | 410 | 0.687 | 0.375 |
| 420 | 0.906 | 0.812 | 420 | 0.69  | 0.38  |
| 430 | 0.902 | 0.803 | 430 | 0.668 | 0.337 |
| 440 | 0.911 | 0.823 | 440 | 0.693 | 0.385 |
| 450 | 0.903 | 0.806 | 450 | 0.693 | 0.385 |
| 460 | 0.91  | 0.822 | 460 | 0.676 | 0.353 |
| 470 | 0.909 | 0.819 | 470 | 0.682 | 0.364 |
| 480 | 0.912 | 0.825 | 480 | 0.69  | 0.38  |
| 490 | 0.906 | 0.812 | 490 | 0.668 | 0.337 |
| 500 | 0.909 | 0.819 | 500 | 0.687 | 0.375 |
| 510 | 0.904 | 0.809 | 510 | 0.671 | 0.342 |
| 520 | 0.909 | 0.819 | 520 | 0.698 | 0.396 |
| 530 | 0.909 | 0.819 | 530 | 0.698 | 0.396 |
| 540 | 0.908 | 0.816 | 540 | 0.698 | 0.396 |
| 550 | 0.91  | 0.821 | 550 | 0.674 | 0.348 |
| 560 | 0.902 | 0.804 | 560 | 0.682 | 0.364 |
| 570 | 0.91  | 0.821 | 570 | 0.679 | 0.359 |
| 580 | 0.912 | 0.826 | 580 | 0.684 | 0.369 |
| 590 | 0.906 | 0.813 | 590 | 0.701 | 0.401 |
| 600 | 0.907 | 0.815 | 600 | 0.703 | 0.407 |
| 610 | 0.906 | 0.812 | 610 | 0.684 | 0.369 |
| 620 | 0.905 | 0.81  | 620 | 0.698 | 0.396 |
| 630 | 0.911 | 0.823 | 630 | 0.69  | 0.38  |
